# Supplementary material
Source: PubMed Central journal article supplement (PMC5669803)

**Supplementary Figure 1:** HT-29 cells were transiently transfected with DRA promoter construct (p-1183/+114) along with the mammalian expression vector for  $\beta$ -galactosidase (pCMV- $\beta$ -gal). 6h or 12h post-transfection, HT-29 cells were treated with different doses of TNF ranging from 5-100 ng/mL for 6h (**A**) or 12h (**B**). Promoter activity was measured by luciferase assays. Values were normalized to  $\beta$ -galactosidase activity to correct for transfection efficiency. Results represent mean  $\pm$  SEM of 3 separate experiments performed in triplicate and expressed as % of control comparing transfected cells treated with TNF to untreated cells (control). \*\*p<0.001 compared with control.

**Supplementary Figure 2:**

Caco-2 cells were transfected with scrambled or I $\kappa$ B/ $\alpha$  specific small interfering RNA (siRNA) for 48h. Scrambled or I $\kappa$ B/ $\alpha$  treated Caco-2 cells were stained for p65 (green), DAPI (blue) and visualized by confocal microscopy. XY planar images and orthogonal XZ images Orthogonal xz images were obtained with a Zeiss LSM 710 confocal microscope.

**Supplementary Figure 3:**

Caco-2 cells were transiently transfected with DRA promoter construct with and without p65 or p50 subunit expression vector. 24h post-transfection. Nuclear lysates were prepared, run on 7.5% SDS-PAGE, transblotted, and Western blotting was performed utilizing anti-p65 or p50 subunit antibody. Representative blot of 3 different experiments is shown

**Supplementary Figure 4:**

Caco-2 cells were transiently transfected with DRA promoter construct with (**A**) Different doses of p65 (0.2-1  $\mu$ g/well) or (**B**) p50 (0.2-1  $\mu$ g/well) subunit expression vector along with mammalian expression vector for  $\beta$ -galactosidase (pCMV- $\beta$ -gal). 24h post-transfection, promoter activity was measured by luciferase assays. Values were normalized to  $\beta$ -galactosidase activity. (**C**) T-84 cells were transiently transfected with DRA promoter construct with and without p65 or p50 subunit expression vector or together along with the mammalian

expression vector for  $\beta$ -galactosidase (pCMV- $\beta$ -gal). 24h post-transfection, promoter activity was measured by luciferase assays. Values were normalized to  $\beta$ -galactosidase activity. Results represent mean  $\pm$  SEM of 3 separate experiments performed in triplicate and expressed as % of control comparing p65 or vehicle transfected (control). \*\*p<0.001 compared with control

**Supplementary Figure 5:**

Caco-2 cells grown in 3D culture system were treated with TNF (50 ng/ml, 24 h). Total RNA was extracted and quantitative real-time RT-PCR was performed utilizing SYBR green fluorescent dye. Data represent the relative expression of NHE2 **(A)** and ZO-1 **(B)** normalized to the respective GAPDH mRNA (internal control) levels. Results are expressed as fold-change in mRNA levels in treated cells compared with control. Data represent mean  $\pm$  SEM of 3 separate experiments. \*\* p<0.001 compared with control.

**Supplementary Figure: 1A**

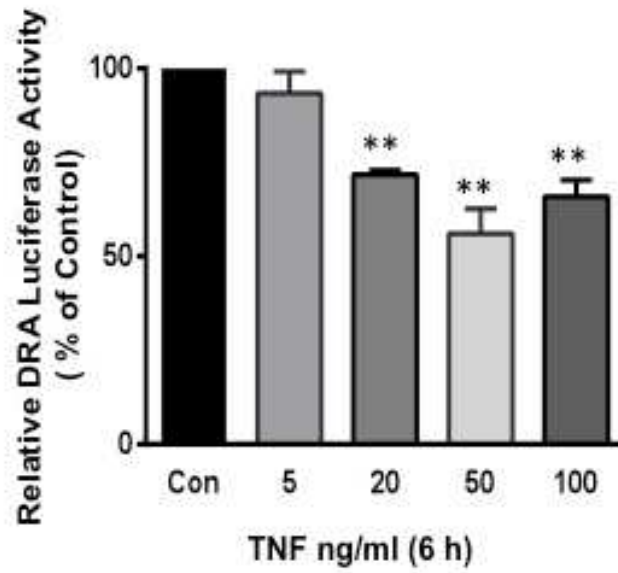

**Supplementary Figure: 1B**

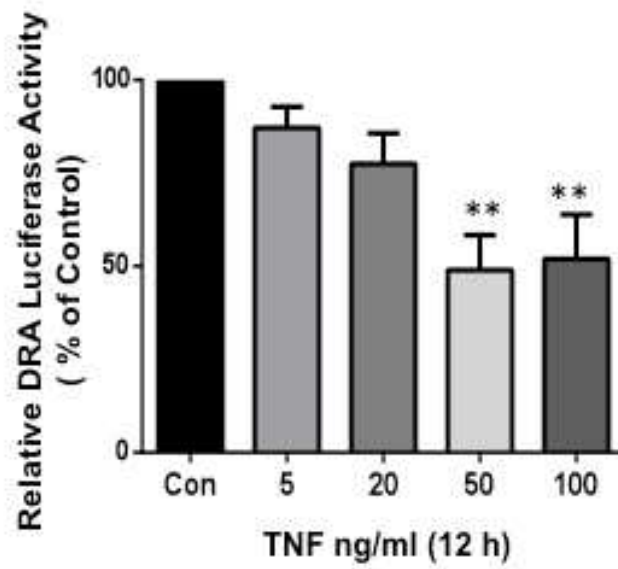

Supplementary Figure : 2

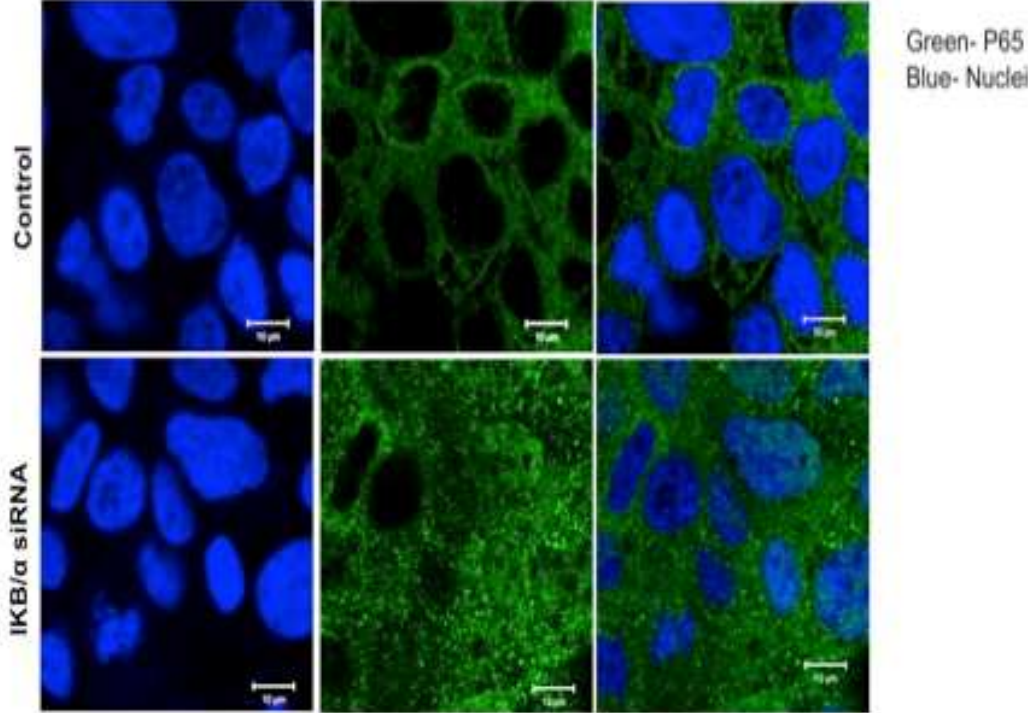

### Supplementary Figure: 3

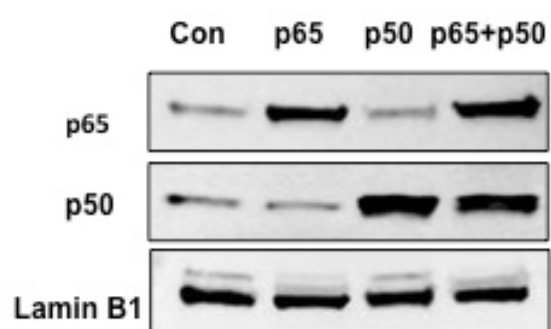

**Supplementary Figure: 4A**

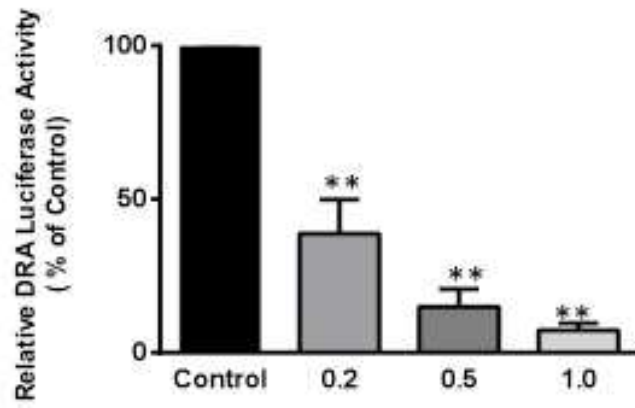

**Supplementary Figure: 4B**

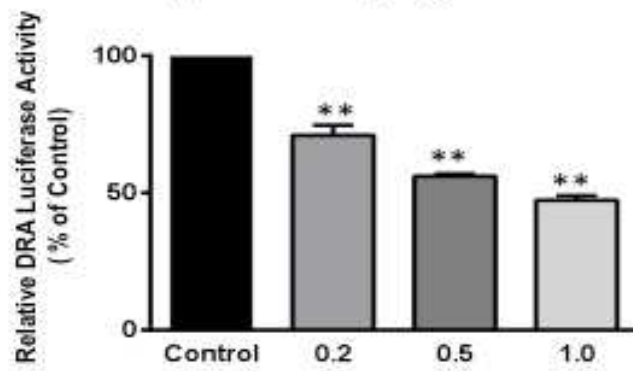

**Supplementary Figure: 4C**

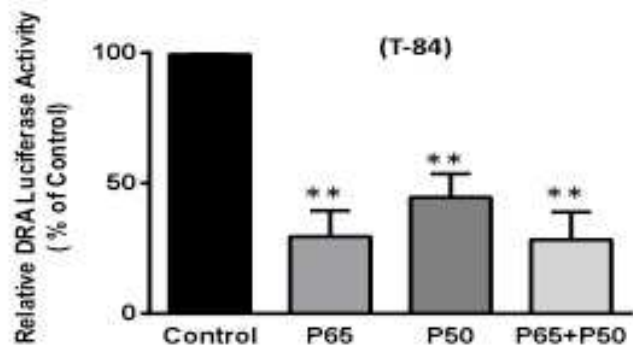

**Supplementary Figure: 5A**

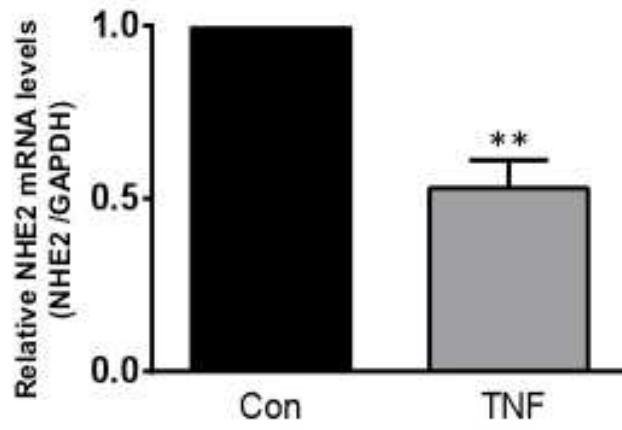

**Supplementary Figure: 5B**

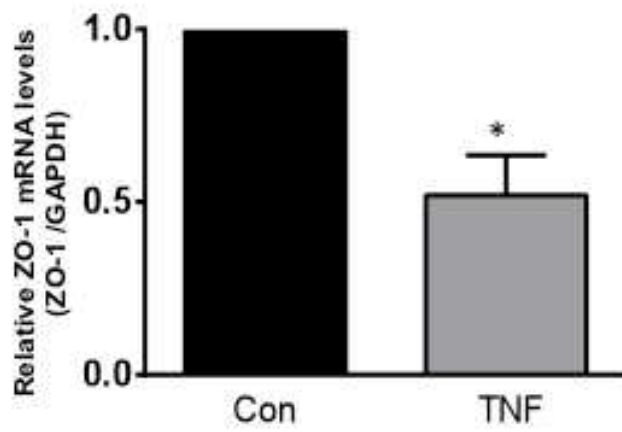

Supplement: NIHMS900451-supplement-supplement_1.pdf [file NIHMS900451-supplement-supplement_1.pdf]
